1 **ACoRE: Accurate SARS-CoV-2 genome reconstruction for the characterization of intra-host**  
2 **and inter-host viral diversity in clinical samples and for the evaluation of re-infections**

3

4 Luca Marcolungo<sup>1\*</sup>, Cristina Beltrami<sup>1\*</sup>, Chiara Degli Esposti<sup>1</sup>, Giulia Lopatriello<sup>1</sup>, Chiara Piubelli<sup>2</sup>,  
5 Antonio Mori<sup>2</sup>, Elena Pomari<sup>2</sup>, Michela Deiana<sup>2</sup>, Salvatore Scarso<sup>2</sup>, Zeno Bisoffi<sup>2,3</sup>, Valentina Grosso<sup>1</sup>,  
6 Emanuela Cosentino<sup>1</sup>, Simone Maestri<sup>1</sup>, Denise Lavezzari<sup>1</sup>, Barbara Iadarola<sup>1</sup>, Marta Paterno<sup>1</sup>, Elena  
7 Segala<sup>1</sup>, Barbara Giovannone<sup>1</sup>, Martina Gallinaro<sup>1</sup>, Marzia Rossato<sup>1,4</sup> and Massimo Delledonne<sup>1,4#</sup>.

8

9 <sup>1</sup>Department of Biotechnology, University of Verona, Strada le Grazie 15, 37134 Verona, Italy

10 <sup>2</sup>Department of Infectious and Tropical Diseases and Microbiology, IRCCS Sacro Cuore Don Calabria  
11 Hospital, Negrar di Valpolicella, 37024 Verona, Italy

12 <sup>3</sup>Department of Diagnostics and Public Health, University of Verona, 37134 Verona, Italy

13 <sup>4</sup>Genartis srl, via IV Novembre 24, 37126 Verona, Italy

14

15 \*These authors contributed equally to this work

16 # corresponding author: [massimo.delledonne@univr.it](mailto:massimo.delledonne@univr.it)

17

18

19

20

21

22  
23  
24  
25  
26  
27  
28  
29  
30  
31  
32  
33  
34  
35  
36  
37  
38  
39  
40  
41  
42  
43  
44  
45  
46

**ABSTRACT**

We report Accurate SARS-CoV-2 genome Reconstruction (ACoRE), an amplicon-based viral genome sequencing workflow for the complete and accurate reconstruction of SARS-CoV-2 sequences from clinical samples, including suboptimal ones that would usually be excluded even if unique and irreplaceable. We demonstrated the utility of the approach by achieving complete genome reconstruction and the identification of false-positive variants in >170 clinical samples, thus avoiding the generation of inaccurate and/or incomplete sequences. Most importantly, ACoRE was crucial to identify the correct viral strain responsible of a relapse case, that would be otherwise mis-classified as a re-infection due to missing or incorrect variant identification by a standard workflow.

**KEYWORDS:** SARS-CoV-2 genome sequencing, genetic variants, re-infection, suboptimal samples, low-viral titer

## 47 **BACKGROUND**

48 The coronavirus disease 2019 (COVID-19) pandemic has thus far resulted in the infection of more than  
49 84 million people, causing at least 1.8 million deaths (Johns Hopkins University, 1/1/2021)[1] . The  
50 agent responsible for COVID-19 is a  $\beta$ -coronavirus known as severe acute respiratory syndrome-  
51 associated coronavirus 2 (SARS-CoV-2) with a compact single-stranded RNA genome of 29,903  
52 nucleotides. The first SARS-CoV-2 genome sequence was published soon after the initial outbreak [2],  
53 and more than 260,000 complete genome sequences have subsequently been deposited in the GISAID  
54 database [3]. The phylogenetic analysis of genomic sequences provides a valuable tool to track viral  
55 diversity during the course of a pandemic and to identify the emergence of prevalent strains  
56 characterized by lineage-specific single nucleotide variants (SNVs), such as the D614G variant in the  
57 SARS-CoV-2 spike protein gene (23403:A→G) [4–6]. As the virus propagates in human-to-human  
58 transmission, changes in the reference genome sequence must be recorded to monitor correlations  
59 between viral genotype and disease communicability, manifestation and severity [4,7–9]. The  
60 combination of genomic analysis and epidemiological data can also reliably determine the extent of  
61 SARS-CoV-2 transmission in different nations [10–12] and thus facilitates early decision-making to  
62 control local transmission [13]. Finally, mutations that may be relevant to the fitness or antigenic  
63 profile of the virus can be identified to ensure the efficacy of vaccines and immunotherapeutic  
64 interventions in the clinic[4,14].

65 Consensus variations reflect the analysis of virus sequences that differ between patients, but the  
66 analysis of intra-individual single nucleotide variations (iSNVs) is also important because it helps us to  
67 understand more about virus–host interactions, as previously demonstrated for Ebola, Zika, influenza  
68 and HIV [15–19]. The analysis of iSNVs during the COVID-19 pandemic may also provide data about  
69 the potential of SARS-CoV-2 for immunological escape and resistance to therapy, as well as on the  
70 sensitivity of molecular diagnostic assays [20–22]. However, the identification of iSNVs in clinical  
71 samples can be challenging because current protocols often feature enrichment and amplification  
72 steps that introduce technical errors indistinguishable from true biological variants [23].

73 The reconstruction of complete and accurate genomic sequences to detect both SNVs and iSNVs is  
74 therefore necessary to produce reliable data, at all these aims. In addition, the accumulation of  
75 meaningful data during pandemics requires the analysis of many samples, and the corresponding  
76 methods must therefore be cost-effective, straightforward and suitable for high-multiplexing [24]. The  
77 protocols must also be sensitive enough to detect low viral titers but applicable over a wide dynamic  
78 range of virus concentrations to allow the analysis of clinical samples with different viral loads, ideally  
79 including samples from early and late infection stages, that usually show a lower viral detection, or  
80 from re-infection/relapse cases [25,26].

81 Among the many approaches available for SARS-CoV-2 whole-genome analysis, the amplicon-based  
82 sequencing method developed by the ARTIC Network [27] is currently the most widely used [13,24,28–  
83 32]. Based on the PrimalSeq protocol originally developed for Zika virus [23,33], the ARTIC Network  
84 designed a set of 98 tiled amplicons in two PCR pools for the targeted whole-genome amplification of  
85 SARS-CoV-2 [27]. This approach is simple and highly sensitive, but it suffers from technical biases  
86 leading to uneven genome coverage, thus reducing the completeness and accuracy of genome  
87 sequencing, especially for the identification iSNVs in samples with low viral titers [34–36]. Sequencing  
88 technical replicates of multiple cDNAs generated from the same sample has been proposed as a  
89 mitigation strategy to identify iSNVs more reliably [23]. However, whereas amplicon-based  
90 sequencing has been widely used for the analysis of low-frequency variants [20–22,37,38] only a few  
91 studies thus far have evaluated the confidence of such calls and have implemented the sequencing of  
92 cDNA replicates to ensure accuracy [23]. False positives have also been reported among high-  
93 frequency variants supported by good sequencing depth, indicating that the risks of inaccurate  
94 sequencing are not limited to suboptimal samples [39].

95 To avoid the generation of incomplete genomic sequences typically associated with poor genome  
96 coverage [40–42], the sequencing of samples with fewer than 1000 virus copies per RT-qPCR reaction  
97 ( $C_t < 30$ ) is currently discouraged [23,43]. However, the strict implementation of such

98 recommendations would lead to the exclusion of many clinical samples, which are often unavoidably  
99 collected or stored under suboptimal conditions. Since specimens with these features may be unique  
100 and irreplaceable -central to the investigation conducted-, numerous studies therefore report  
101 sequencing data from samples with (very) low viral titers ( $Ct > 30$ ) despite this advice [26,44,45] . To  
102 address these challenges, we set out to develop an optimized workflow, ACoRE (Accurate SARS-CoV-  
103 2 genome Reconstruction, for the reliable reconstruction of complete and accurate SARS-CoV-2  
104 genomes from clinical samples with a broad range of Ct values, aiming to improve the flexibility,  
105 accuracy and throughout of amplicon-based sequencing.

## 106 **RESULTS**

### 107 **Accuracy of SARS-CoV-2 genome reconstruction**

108 The original Primalseq protocol stipulates two independent reverse transcriptions per sample and the  
109 subsequent amplification of the separate cDNAs in order to reduce technical errors. In this study, we  
110 initially tested replicate amplifications from the same cDNA to investigate whether this alternative  
111 approach could affect the reproducibility in the generation of SARS-CoV-2 consensus sequences and  
112 in the identification of intra-host variants. At this aim, we selected five COVID-19-positive swabs  
113 representing viral loads ranging from ~500 to ~2 million, based on Ct values (determined by RT-qPCR)  
114 ranging from 15.07 to 28.5 (**Table S1**). For each sample, we generated three cDNAs and carried out  
115 two separate amplifications, resulting in six replicates per starting RNA (**Figure 1A**). An individual KAPA  
116 library was prepared from each replicate, and sequencing in 250PE mode produced an average of  
117 1 million fragments. The dataset was normalized to ~800,000 fragments per library, corresponding to  
118 ~7800× coverage per sample after alignment to the SARS-CoV-2 reference genome (**Table S3**).

119 The sequencing coverage was variable across the different amplicons of the ARTIC panel, particularly  
120 in samples with a higher Ct value (**Figure 2 and Figure S1**). Interestingly, most amplicons showed either  
121 high (>500×) or very low ( $\leq 10\times$ ) to zero coverage, and amplicons absent in one replicate could be

122 present in another, even when produced from the same cDNA. The concordance ( $R_c$ ) in sequencing  
123 coverage was high for replicates of four samples ( $R_c \sim 0.99-1$ ) but lower in sample S5 ( $R_c \sim 0.95$ ) with  
124 the lowest viral load (**Figure 1B and Table S4**), but there was no significant difference between  
125 replicates from the same or different cDNAs ( $p = 0.25$ , Wilcoxon test). Variations in coverage can affect  
126 genotyping accuracy, so we evaluated reproducibility in terms of genotypability by calculating the  
127 fraction of genomic positions where it is possible to call a genotype after aligning reads to the  
128 reference genome. The genotypability  $R_c$  was optimal or slightly lower than 1 in all samples ( $R_c = 0.99-$   
129  $1$ ), but lower in sample S5, which also showed the lowest sequencing coverage  $R_c$  (**Figure 1C and Table**  
130 **S5**). Reproducibility was similar between inter-cDNA replicates and intra-cDNA replicates ( $p > 0.99$ ,  
131 Wilcoxon test). To assess how fluctuations in genotypability and coverage affect the final viral genome  
132 sequences, we generated a consensus sequence for each replicate. The reproducibility among  
133 consensus variants was optimal in the first four samples, but consistently dropped to  $\sim 0.3$  for sample  
134 S5 (**Figure 1D and Table S6**). Nevertheless, reproducibility was again similar between inter-cDNA  
135 replicates and intra-cDNA replicates ( $p > 0.99$ , Wilcoxon test).

136 The number of iSNVs (frequency  $>3\%$ ) varied significantly between technical replicates, with a small  
137 fraction of iSNVs shared by different replicates compared to the total number of iSNVs identified  
138 (**Table S7**). The  $R_c$  was suboptimal ( $<0.95$ ) for all samples and steadily decreased as the Ct value  
139 increased (**Figure 1E and Table S8**), but there was no significant difference between replicates  
140 generated from the same or different cDNAs ( $p = 0.44$ , Wilcoxon test). In summary, consensus  
141 sequences and intra-host variants can be strongly affected by uneven amplicon representation and  
142 PCR errors (**Figure 2**) confirming the need to sequence at least two replicates to achieve an accurate  
143 characterization of the SARS-CoV-2 genome. However, the two amplifications can be generated from  
144 the same starting cDNA, thus reducing sample consumption and costs.

145 **Improvement of genome reconstruction by merging technical replicates**

146 While addressing the reproducibility issues observed for both SNVs and iSNVs in samples with low viral  
147 loads, we also tested whether merging two or more technical replicates could improve coverage and  
148 genotypability. The rationale was the observation that amplicons with the lowest coverage varied  
149 across different replicates, and amplicons missing in one replicate could have a coverage >100× or  
150 >1000× in others (**Figure S1**). All possible combinations of two replicates for each sample were merged  
151 and downsampled to 800,000 fragments (400,000 for each replicate) to obtain the same sequencing  
152 input data as the initial analysis based on a single replicate (**Table S9**). When considering the merged  
153 datasets rather than single-replicate data, the average coverage consistently increased in the sample  
154 with the highest Ct value ( $p < 0.0001$ , Mann Whitney U-test), confirming that merging two  
155 amplification replicates (intra-cDNA or inter-cDNA) could mitigate the technical variability in amplicon  
156 coverage (**Figure 3A-C**) as well as significantly ( $p < 0.0001$ , Mann Whitney U-test) enhance the  
157 genotypability (**Figure 3B**). Merging up to six replicates achieved a slight further improvement in both  
158 coverage and genotypability (**Figure 3A-B**), indicating that both properties can be maximized by  
159 analyzing replicates of samples with low viral loads. Indeed, merging all sequence data available for  
160 sample S5 (with the lowest reproducibility) increased coverage sufficiently to achieve >96.98% non-  
161 ambiguous bases in the consensus sequence (**Figure 3C-D**), which is the GISAID threshold for  
162 classifying a SARS-CoV-2 genome as complete [3]. Similar improvement was achieved in a panel of 170  
163 clinical samples analyzed in duplicate or quadruplicate (**Figure 3E-G** shows three representative  
164 samples).

165 **Improvement of the technical workflow for viral genome sequencing**

166 One drawback of the ARTIC protocol on the Illumina platform is the need for 250PE sequencing to  
167 cover the full length of the amplicons (400 bp). This type of sequencing is currently available only for  
168 MiSeq and NovaSeq6000 SP flow cells, increasing the cost per sample and reducing the sample  
169 throughput. We therefore generated shorter libraries using the NexteraFlex approach and tested the  
170 use of alternative flow cells (NextSeq500/550 and NovaSeq6000 S1) and sequencing mode (150PE) on

171 the 30 samples originally tested using the KAPA library (**Figure 1A**). Despite skipping the laborious  
172 input DNA and library quantification steps before sequencing, the variability in the number of  
173 fragments analyzed per sample was lower (CV = 22.5%) than the full-amplicon approach (CV = 38.3%)  
174 described above (**Figure 4A**). The sequencing data were mapped to the reference genome (**Table S10**)  
175 and compared to the 250PE dataset (KAPA library) normalized with the same average-mapped  
176 coverage as the 150PE dataset (NexteraFlex library) (**Table S11**). Sequencing coverage was evenly  
177 distributed along the amplicons even when the NexteraFlex protocol was used, because the partial  
178 overlap of ARTIC amplicons compensated for the expected loss of sequence representation at the  
179 amplicon ends due to tagmentation (**Figure 4B**). The sequencing of fragmented amplicons had no  
180 adverse impact on genome coverage and genotypability, which were significantly higher compared to  
181 the full-length amplicon sequencing ( $p < 0.001$  and  $p = 0.024$ , respectively, Friedman test; **Figure 4C-**  
182 **D**). Despite the lower coverage, similar results were observed with 100PE sequencing simulated after  
183 trimming the 150PE dataset (**Figure 4C-D**). The fragmented-amplicon approach was therefore  
184 advantageous for multiple aspects of SARS-CoV-2 sequencing, by increasing coverage, genotypability  
185 and throughput (allowing higher multiplexing) while reducing sequencing costs and eliminating  
186 unnecessary protocol steps such as DNA quantification after PCR and library quantification before  
187 pooling.

188 Although the NexteraFlex protocol saves on costs, this is offset by the requirement for multiple  
189 sequencing replicates from the same sample to improve genome coverage. We therefore compared  
190 the effect of sequencing a library generated from two replicates (each amplified from 5  $\mu$ L of cDNA)  
191 and a standard library prepared from a single amplification generated from double amount of cDNA  
192 (10  $\mu$ L). Because samples with a low viral load benefit the most from multiple replicates, we analyzed  
193 20 samples with a Ct range of 25–35 (**Figure S2A**). Two samples showed a lower coverage in libraries  
194 produced from a single cDNA, but overall there was little difference in coverage ( $p = 0.1$ ) or  
195 genotypability ( $p = 0.09$ ) when comparing the two conditions (Wilcoxon test; **Figure S2B-C**). This result  
196 confirmed that the reconstruction of SARS-CoV-2 genomes can also be maximized by increasing the



197 amount of template cDNA through the use of more complex samples. Although such adjustments can  
198 improve coverage and genotypability, technical replicates are still required for the identification of  
199 true-positive variants.

### 200 **Application of the optimized workflow to large sets of samples**

201 Next we applied the optimized workflow to a set of 170 clinical samples representing a wide range of  
202 viral loads, with Ct values in the range 15–40 (**Figure S3**). Each sample was amplified in duplicate or  
203 quadruplicate starting from 10  $\mu$ L cDNA, and 100PE sequencing was carried on a NovaSeq6000 SP flow  
204 cell using NexteraFlex libraries, generating an average of  $\sim$ 2.8 million fragments per replicate (**Table**  
205 **S12**). After pooling data from the replicates,  $\sim$ 75% of the samples showed both coverage and  
206 genotypability  $>$ 96.98% (**Figure 5A-B**) which is a clear improvement over the sequencing of a single  
207 cDNA (**Figure 5C-D**). Most (90.9%) of the samples that were not fully reconstructed were characterized  
208 by a low viral load (Ct  $>$  30), but almost half (45%) of the samples in this Ct value range were  
209 nevertheless reconstructed optimally (**Figure 5E-F**). In particular, five of the seven viral genomes from  
210 swabs with a Ct value  $\geq$  38 were completely reconstructed ( $>$ 96.98%), indicating that the outcome is  
211 not solely determined by the viral titer in the starting material. In order to generate accurate  
212 consensus sequences, we applied the same approach used to identify true-positive iSNVs (only  
213 variants in both replicates were included in the final consensus). This approach revealed that 22  
214 samples (12.94%), with Ct 25.9-40, would have included at least one false-positive variant in the  
215 consensus sequences based on single-cDNA analysis, but these were efficiently removed by  
216 considering the concordance between replicates (**Table S13**).

### 217 **Impact of genome reconstruction accuracy on the evaluation of a potential re-infection case**

218 The identification of SARS-CoV-2 genetic variants at different time points can reveal whether recurrent  
219 infections are relapses caused by the same strain or independent infections with a different strain.  
220 We therefore evaluated our optimized workflow in a case-study of relapse/re-infection involving a 48-  
221 year-old female patient who was hospitalized with mild COVID-19 symptoms following a positive

222 nasopharyngeal swab on 4/3/2020, discharged with no symptoms on 11/3/2020 followed by two  
 223 consecutive negative swab tests, but readmitted with mild COVID-19 symptoms 12 days later. During  
 224 the second hospital stay, the nasopharyngeal swab test results fluctuated, and the patient was finally  
 225 discharged on 21/4/2020 with no symptoms, and two consecutive negative molecular tests. Three  
 226 swab samples (one from the first and two from the second hospitalization period) were sequenced to  
 227 identify the viral strain responsible for infection (**Table 1**). All samples were sequenced in duplicate or  
 228 quadruplicate (**Table S14**), and consensus variants were called in order to identify the viral strains.  
 229 Depending on the replicate, some consensus variants identified in the first hospitalization period were  
 230 missing or could not be genotyped in the second hospitalization period, leading to the hypothesis that  
 231 different strains could be responsible for each infection (**Table 1**). In contrast, when merging  
 232 sequencing replicates, the same variants were identified in all three samples (**Table 1**) and a very high-  
 233 frequency (99.95%) false-positive variant could be identified at position 12890 (**Table S13**). Based on  
 234 this analysis, we concluded that the same viral strain was responsible of both the first and second  
 235 infection, and that the latter should therefore not be classed as a re-infection.

236 **Table 1. High-frequency variants identified in the COVID-19 relapse case study**

|          |                  | 1° Hospitalization |      |      |      |        | 2° Hospitalization |      |        |            |      |      |      |        |
|----------|------------------|--------------------|------|------|------|--------|--------------------|------|--------|------------|------|------|------|--------|
|          |                  | 05/03/2020         |      |      |      |        | 22/03/2020         |      |        | 03/04/2020 |      |      |      |        |
|          |                  | Ct 27              |      |      |      |        | Ct 34              |      |        | Ct 35.7    |      |      |      |        |
| Genome   | Reference allele | 9075               | 9075 | 9075 | 9075 | 9075   | 9076               | 9076 | 9076   | 9078       | 9078 | 9078 | 9078 | 9078   |
| Position |                  | 1.1                | 1.2  | 2.1  | 2.2  | merged | 1.1                | 1.2  | merged | 1.1        | 1.2  | 2.1  | 2.2  | merged |
| 241      | C                | T                  | T    | T    | T    | T      | T                  | -    | T      | -          | -    | -    | T    | T      |
| 3037     | C                | T                  | T    | T    | T    | T      | -                  | -    | -      | -          | T    | -    | -    | T      |
| 13620    | C                | T                  | T    | T    | T    | T      | T                  | -    | T      | -          | -    | T    | T    | T      |
| 14408    | C                | T                  | T    | T    | T    | T      | T                  | T    | T      | -          | -    | -    | T    | T      |
| 23403    | A                | G                  | G    | G    | G    | G      | G                  | G    | G      | -          | -    | G    | -    | G      |
| 28881    | G                | A                  | A    | A    | A    | A      | -                  | A    | A      | -          | A    | -    | -    | A      |
| 28882    | G                | A                  | A    | A    | A    | A      | -                  | A    | A      | -          | A    | -    | -    | A      |
| 28883    | G                | C                  | C    | C    | C    | C      | -                  | C    | C      | -          | C    | -    | -    | C      |

237 The positions of high-frequency variants (>75%) are shown in the consensus sequence of a specimen  
238 collected during the first hospitalization. For each of these positions, the genotypes identified in the  
239 samples collected during the second hospitalization are also shown. Genotypes are reported for each  
240 sequencing replicate independently or after merging all replicates from the same sample (merged).  
241 Positions that could not be genotyped are indicated with a dash.

## 242 **DISCUSSION**

### 243 **Protocol optimization for simplicity, flexibility, throughput and cost-efficiency**

244 Amplicon-based sequencing (originally called PrimalSeq) is the most sensitive and widely-used  
245 protocol for SARS-CoV-2 whole-genome analysis from clinical isolates, but its disadvantages include  
246 uneven amplicon coverage and poor accuracy when the viral load is low [23]. We addressed these  
247 limits by improving the accuracy and completeness of sequencing, as well as the cost-efficiency and  
248 throughput, thus achieving the highly reliable analysis of SARS-CoV-2 genomes. This benchmarking  
249 analysis established a robust workflow, ACoRE, that allowed the complete and accurate  
250 characterization of SARS-CoV-2 genomes in 170 clinical samples, including a subset (42%) with very  
251 low viral titers ( $Ct \geq 30$ ). We were also able to properly categories an infection-relapse case study.

252 The protocol optimized by the ARTIC Network for SARS-CoV-2 genome sequencing utilizes a tiling  
253 primer scheme generating 400-bp viral amplicons for adaptor ligation and 250PE sequencing [33]. This  
254 limits the sequencing options on Illumina platforms because this read type is compatible only with the  
255 MiSeq v2 chemistry and NovaSeq6000 SP flow cells. To increase flexibility, we used the NexteraFlex  
256 kit to prepare amplicon libraries with shorter inserts (170–200 bp) suitable for 150PE sequencing  
257 without loss of performance. This also confers the ability to pool up to 384 samples in a single run  
258 using unique dual indexes, reducing costs from €80 per sample to €3.5 on the NovaSeq6000 with S1  
259 flow cell or €12 on the NextSeq500 with HighOutput flow cell. Even shorter sequencing reads (100PE)  
260 resulted in shorter overlap of paired ends, reducing the number of sequencing fragments required per  
261 sample and translating to even lower costs of €3 per sample. Because the NexteraFlex method does  
262 not require the quantification of starting amplicons or final sequencing libraries, this further reduces  
263 costs and processing time. Further savings could potentially be achieved by using half the volume of

264 tagmentase reagent, but testing is required to ensure that accuracy and coverage is maintained. The  
265 generation of amplification replicates from a single starting cDNA (instead of multiple cDNAs, as  
266 recommended by the original protocol[23]) would also save time and costs, while preserving the  
267 sample for additional tests. The fragmented amplicon approach and other adjustments therefore  
268 improved protocol simplicity, flexibility, multiplexing and economy, allowing the cost-effective and  
269 timely processing of larger cohorts of samples by ACoRE.

### 270 **Sequencing multiple replicates to increase accuracy and completeness**

271 Clinical specimens with low viral loads reduce the accuracy of variant calling and the completeness of  
272 genome reconstruction, both of which are inversely correlated with the quality and quantity of  
273 starting material[23,30,43]. Current guidelines for viral genotyping recommend a lower limit of 1000  
274 virus copies per reaction [23,43] but this would rule out a large proportion of clinical samples,  
275 including ~53% of the samples in our cohort. A Ct value of ~25 was identified as the median for virus  
276 detection in symptomatic patients, with a consistent proportion of samples (15–25%) falling above Ct  
277 30 [25,46] . Low viral loads are often found in patients with prolonged COVID-19 infection [47–49],  
278 and five of six reported cases of potential re-infection involved samples with Ct values >30 [50], but  
279 whole-genome sequencing is nevertheless recommended to differentiate between relapse and new  
280 infections caused by a different SARS-CoV-2 variants [50,51]. The ability to sequence SARS-CoV-2  
281 genomes in low-titer samples is therefore necessary to track infections and correlate different strains  
282 with disease communicability, manifestation and severity.

283 Increasing the depth of sequencing has been proposed as a strategy to achieve complete genome  
284 reconstruction in low-titer samples, but this does not overcome limitations caused by missing  
285 amplicons [43]. Similarly, improvement in ARTIC primer design and compatibility (currently version 3)  
286 can also ameliorate genome coverage, but again cannot make up for missing amplicons [24,30] . We  
287 found that only a few specific amplicons were reproducibly suboptimal (64, 70 and 91) whereas most  
288 showed coverage variations limited to particular samples or replicates. We therefore merged the

289 sequencing data from two or more replicates as a simple solution to enhance coverage and  
290 genotypability, achieving a more homogeneous representation of the viral genome and rescuing the  
291 suboptimal samples. The random amplification observed in low-titer samples most likely reflects the  
292 low sample complexity rather than poor assay sensitivity or performance. Accordingly, the sampled  
293 RNA and corresponding cDNA fragments before amplification are unlikely to represent the complete  
294 genome based on our observation that the coverage achieved by sequencing two amplification  
295 replicates (each from 5  $\mu$ L of cDNA) was similar to that achieved with a single amplification starting  
296 from double the amount of cDNA (10  $\mu$ L). Therefore, to optimize genome reconstruction, a single large  
297 cDNA batch should be amplified in several parallel reactions, using as much sample volume as possible  
298 to increase complexity. The multiple PCR products can then be pooled before library preparation and  
299 sequenced as a single sample to avoid increasing costs.

300 As well as improving coverage and genotypability, at least two amplification reactions must be  
301 analyzed to achieve accurate variant calling (SNVs and iSNVs). It is well established that the analysis  
302 of viral iSNVs down to 3% frequency requires the generation of multiple replicates to distinguish true-  
303 positive iSNVs from low-frequency PCR or sequencing errors [23]. In contrast, the generation of  
304 consensus sequences for the analysis of SNVs in epidemiological studies requires the identification of  
305 the most-frequent nucleotide at each position and is typically based on single replicates [12,45].  
306 However, we discovered that consensus sequences also contain frequent SNV errors (>12% in our  
307 cohort) and the comparison of technical replicates is required to ensure accuracy. This was not  
308 confined to low-titer samples (Ct > 30) but also included some samples with moderate viral loads (Ct  
309 = 25–30) potentially leading to the submission of inaccurate consensus sequences to public  
310 repositories such as GISAID. These false-positive variants probably arose due to PCR errors because  
311 they were not found in other amplification replicates (either from the same or different cDNA).  
312 However, studies reporting SARS-CoV-2 consensus sequences thus far have not included the analysis  
313 of technical replicates, even in the case of low-titer samples (Ct > 30)[26,52]. The accuracy of SARS-  
314 CoV-2 consensus sequences deposited in GSAID has been called into question for documented

315 sequences with putative errors or a significant number of variants in one particular submission  
316 (singletons) [35] and the use of stringent filters and bioinformatic tools has been proposed as a  
317 solution [52,53]. Instead, with ACoRE we propose the use of replicates as a simple experimental  
318 solution to avoid the generation of incorrect consensus sequences prior to database submission.

### 319 **The assessment of re-infections**

320 Reconstruction of highly accurate sequences from sub-optimal samples was crucial to identify the  
321 correct viral strain responsible of a second hospitalization case, that was hypothesized to be a re-  
322 infection. A standard workflow would have missed or included incorrect variants in support of such  
323 hypothesis, while ACoRE properly recognized that the different time-point samples contained the  
324 same viral strain.

325 Another interesting example, that would certainly benefit of ACoRE, comes from a publication that  
326 reported the first individual in North America to have symptomatic reinfection with SARS-CoV-2 [26],  
327 for whom “...genomic analysis of SARS-CoV-2 showed genetically significant differences between each  
328 variant associated with each instance of infection...” suggesting that “...the patient was infected by  
329 SARS-CoV-2 on two separate occasions by a genetically distinct virus...” [45]. The viral load of the swab  
330 samples analyzed in that study was very low (Ct > 35) based on 14–22 PCR cycles-protocol without  
331 amplification replicates, therefore potential false-positive variants and/or regions with low  
332 genotypability may have influenced the results. We reanalyzed the data and noted that two of the  
333 four variants specifically associated with the first infection had insufficient sequencing coverage to  
334 achieve confident variant calling in the sample from the second infection (**Table S15**). In particular,  
335 our bioinformatic pipeline revealed that position 539 was covered by only five reads, thus a genotype  
336 could not be properly called; while variant 16741G→T (supported by 10 reads) was only just above  
337 the genotypability threshold of 8 (**Table S15**). These positions were genotyped using the bioinformatic  
338 pipeline utilized by the authors because the limit was set to five reads. Furthermore, variant 4113C→T  
339 showed frequency of 67.82% in the first infection, suggesting that two viral strains were already

340 present: a predominant strain carrying the identified variant and a less-abundant strain lacking the  
341 variant that became prevalent in the second infection (**Table S15**). However, the absence of replicate  
342 analysis makes it impossible to confirm this hypothesis. Similarly, although the final variant  
343 (7921A→G) was abundant, the absence of replication makes it impossible to rule out the possibility  
344 of an amplification error, as frequently observed in our low-titer samples. These questions could be  
345 resolved by sequencing two technical replicates rather than analyzing data from one sequencing  
346 library using two different pipelines (as reported by the authors). The conclusions put forward by the  
347 authors therefore appear to be only weakly supported by the raw data, but would nevertheless have  
348 a major impact on future research by highlighting the possibility of re-infection and thus possibly  
349 questioning the efficacy of vaccines. The analysis of such critical samples would greatly benefit from  
350 the use of technical replicates, and robust evaluation is particularly important due to the ramifications  
351 of the conclusions for the global research and biomedical communities.

## 352 **CONCLUSIONS**

353 We have optimized ACoRE, a workflow for SARS-COV-2 sequencing to improve flexibility and  
354 throughout, thus reducing assay time and costs and facilitating the robust analysis of suboptimal  
355 samples that would normally be excluded from sequencing even if they are central and irreplaceable  
356 specimens. The sequencing of such low-titer samples without replication risks the generation of  
357 consensus sequences containing false-positive SNVs and iSNVs, but we found that the inclusion of  
358 technical replicates improves both the accuracy and completeness of viral genome analysis. This  
359 reduces the risk of generating inaccurate and incomplete genomic sequences, favoring the submission  
360 of robust sequences to public databases and enhancing the downstream analysis of SARS-CoV-2  
361 genotyping data.

## 362 **METHODS**

### 363 **Clinical samples**

364 178 Nasopharyngeal swabs (eSwab, Copan, Italy) were obtained from 172 COVID-19 patients  
365 diagnosed at the Department of Infectious, Tropical Diseases and Microbiology of the IRCCS Sacro  
366 Cuore Don Calabria Hospital, qualified for SARS-CoV-2 molecular diagnosis by the regional reference  
367 laboratory (Department of Microbiology, University Hospital of Padua). After collection, swabs were  
368 stored at 4 °C for a maximum of 48 h and analysed by the routine-used molecular diagnostic method  
369 (RT-qPCR as indicated in the following paragraph). The remaining quantity of swab was then aliquoted  
370 and preserved at –80 °C. The study was approved by the competent Ethical Committee for Clinical  
371 Research of Verona and Rovigo Provinces (Prot N° 39528/2020).

### 372 **RNA extraction and RT-qPCR analysis**

373 The routine RT-qPCR protocol was based on a recommended test (emergency use authorization)  
374 standardized according to I asked what I'm reading WHO guidelines. Briefly, RNA was extracted from  
375 200µL of swabs using the automated Microlab Nimbus workstation (Hamilton, Reno, NV, USA) coupled  
376 to a Kingfisher Presto system (Thermo Fisher Scientific, Waltham, MA, USA). We also used a  
377 MagnaMax Viral/Pathogen extraction kit (Thermo Fisher Scientific) according to the manufacturer's  
378 instructions. RT-qPCR was carried out using the CDC 2019-nCoV rRT-PCR Diagnostic Panel assay and  
379 protocol [54], targeting the nucleocapsid protein gene regions N1 and N2 (with the human RNase P  
380 gene as the internal control) on a CFX96 Touch system (Bio-Rad Laboratories, Milan, Italy) with white  
381 plates. The amplification cycle threshold (Ct) was determined using CFX Maestro (Bio-Rad  
382 Laboratories), setting a baseline threshold at 200 relative fluorescence units (RFU). A standard curve  
383 from 5 to 500 genome copies per reaction was performed with serial dilution of the CDC control  
384 plasmid containing the complete nucleocapsid gene of SARS-CoV-2 (**Table S1**).

### 385 **Reverse transcription and amplification of the SARS-CoV-2 genome**

386 Samples with Ct values of 15–18 were diluted 10-fold as suggested by the ARTIC Network [27]. RNA  
387 from swab samples (5 µL) was first incubated with 1 µL of 60 µM Random Primer Mix (New England  
388 Biolabs, Ipswich, MA, USA) and 1 µL of 10 mM dNTPs (New England Biolabs) at 65 °C for 5 min followed



389 by 1 min on ice to anneal the primers. We then added 4  $\mu\text{L}$  of 5 $\times$  SSIV buffer, 1  $\mu\text{L}$  of 100 mM DTT, 1  
390  $\mu\text{L}$  of 40 U/ $\mu\text{L}$  RNaseOUT, 1  $\mu\text{L}$  of 200 U/ $\mu\text{L}$  SSIV enzyme (Thermo Fisher Scientific) and 6  $\mu\text{L}$  nuclease-  
391 free water (total reaction volume = 20  $\mu\text{L}$ ) and heated the reaction to 23  $^{\circ}\text{C}$  for 10 min, 52  $^{\circ}\text{C}$  for 10  
392 min and 80  $^{\circ}\text{C}$  for 10 min. We generated two or three cDNAs from each sample (depending on the  
393 experiment), each of which was amplified 2–3 times using the ARTIC protocol. In each case, we mixed  
394 2.5 or 5  $\mu\text{L}$  cDNA (depending on the experiment) with 3.7  $\mu\text{L}$  of 10  $\mu\text{M}$  primer pools A and B from the  
395 ARTIC nCoV-2019 V3 panel (IDT, Coralville, IA, USA), 12.5  $\mu\text{L}$  Q5 high-fidelity DNA polymerase 2 $\times$  (New  
396 England Biolabs) for each of the primer pools, and nuclease-free water to a final volume of 25  $\mu\text{L}$ . The  
397 reaction was heated to 98  $^{\circ}\text{C}$  for 30 s, followed by 25 cycles (sample Ct  $\leq$  21) or 35 cycles (sample Ct  
398  $>$  21) of 98  $^{\circ}\text{C}$  for 15 s and 65  $^{\circ}\text{C}$  for 5 min. The PCR products were then combined in a single tube,  
399 cleaned up using 1 $\times$  AMPure XP beads (Beckman Coulter, Brea, CA, USA) and eluted in 15  $\mu\text{L}$  of water.  
400 The resulting amplicons were analyzed on the 4150 TapeStation System (Agilent Technologies, Santa  
401 Clara, CA, USA) and quantified using the Qubit dsDNA HS Assay kit (Thermo Fisher Scientific).

#### 402 **Full-length amplicon sequencing**

403 Libraries were prepared from 50 ng of virus amplicons using the KAPA Hyper prep kit and unique dual-  
404 indexed adapters (5  $\mu\text{L}$  of a 15  $\mu\text{M}$  stock) according to the supplier's protocol (Roche, Basel,  
405 Switzerland). The post-ligation products were cleaned up using 0.8 $\times$  AMPure XP beads followed by  
406 library amplification (six cycles) with the KAPA Library Amplification Primer Mix (Roche). After a clean-  
407 up with 1 $\times$  AMPure XP beads, the libraries were analyzed on the 4150 TapeStation System (average  
408 size 526–573 bp) and quantified using the Qubit dsDNA BR Assay kit (Thermo Fisher Scientific).  
409 Barcoded libraries were pooled at equimolar concentrations and sequenced on the MiSeq platform  
410 (Illumina, San Diego, CA, USA) with Miseq Reagent kit v2 to generate 250-bp paired-end (250PE) reads.

#### 411 **Fragmented amplicon sequencing**

412 Libraries were prepared from 10  $\mu\text{L}$  of purified viral amplicons using the NexteraFlex kit (Illumina)  
413 according to the manufacturer's recommendations, and combinatorial dual indexes were added in six

414 cycles of PCR. We cleaned up 10- $\mu$ L aliquots of each amplified library using a 1:1 ratio of sample  
415 purification beads (Illumina) and eluted the purified library in 20  $\mu$ L of resuspension buffer (Illumina).  
416 The resulting libraries were analyzed on the 4150 TapeStation System (average size 335–369 bp),  
417 pooled and quantified using the Qubit dsDNA BR Assay kit. The libraries were sequenced on a Novaseq  
418 6000 device (Illumina) using an SP flow cell to generate 100-bp paired-end (100PE) reads, or on a  
419 NextSeq500 (Illumina) to generate 150-bp paired-end (150PE) reads.

#### 420 **Data filtering and reference genome alignment**

421 Full-length amplicon sequencing data were randomly downsampled using *seqtk sample v1.3*  
422 (<https://github.com/lh3/seqtk>). To compare sequencing data from the full-length and fragmented  
423 amplicons, KAPA library reads were downsampled at the same mean mapped coverage as the  
424 corresponding NexteraFlex replicates using *sambamba v0.6.7* [55]. To simulate sequencing using  
425 100PE reads, data from the fragmented amplicon libraries were trimmed using a custom script. All  
426 sequencing datasets were trimmed for quality and adapters were removed using *Trimmomatic v0.39*  
427 [56] with the following parameters: *ILLUMINACLIP:adapters\_file:2:30:10 LEADING:5 TRAILING:5*  
428 *SLIDINGWINDOW:4:20*. Filtered reads were aligned to the SARS-CoV-2 reference genome (GenBank  
429 ID: *MN908947.3*) using *BWA MEM v0.7.17* [57] with default parameters and the relative alignment  
430 file was converted to a binary alignment map (BAM) file using *SAMtools v1.9* [58]. For the fragmented  
431 libraries, duplicate reads were identified and discarded using *Picard v2.21.1*  
432 (<http://broadinstitute.github.io/picard>). Subsequently, *iVar v1.2.2 trim* [23] was used to remove ARTIC  
433 v3 primer sequences from the BAM files. For the fragmented libraries, the *-e* parameter was used to  
434 include reads without primers. Finally, overlapping portions of reads were clipped using *fgbio ClipBam*  
435 *v1.1.0* (<https://github.com/fulcrumgenomics/fgbio>) with the following parameters: *--clip-overlapping-*  
436 *reads -c Hard* to avoid counting multiple reads representing the same fragment. Coverage and  
437 genotypability statistics were calculated from the BAM files using *bedtools genomecov v2.19.1* [59]

438 and *GATK CallableLoci v3.8* [60], respectively. Raw genomic sequencing data were deposited in NCBI  
439 GenBank (BioProject no PRJNA690890).

#### 440 **Consensus variant calling and generation of the consensus sequence**

441 A pileup was calculated for each position in the BAM file of each replicate using the *SAMtools v1.9*  
442 *mpileup* option with parameters *-aa -A -d 0 -Q 0*. The resulting files were used as input for *iVar*  
443 *consensus v1.2.2* [23] to generate consensus sequences, considering those positions covered by at  
444 least three reads (parameters: *-t 0 -m 3*). The most abundant nucleotide for each position was  
445 reported in the consensus sequence, whereas positions covered by fewer than three reads or  
446 reporting an equal proportion of nucleotides were represented by the ambiguous character N.

447 To call variants present in the consensus sequences (consensus variants), sequences were aligned to  
448 the SARS-CoV-2 reference genome using *Minimap v2.17* [61] and the alignment file was converted to  
449 the BAM format using *SAMtools v1.9*. Consensus variants were then called using *bcftools call v1.10.2*  
450 [58] with the following parameters: *--ploidy 1 -A -m -P 0.05 -M -Oz*.

451 Final consensus sequences from the cohort of 170 samples and the relapse case were called after  
452 merging sequencing data for each individual replicate. False-positive variants in the consensus  
453 sequence were identified manually by comparing the presence of discordant iSNVs at the same  
454 genomic position between replicates of the same sample and considering only positions genotyped in  
455 both replicates. False-positive variants were removed from consensus sequences and replaced with  
456 the reference allele.

#### 457 **iSNV variant calling**

458 Alignment BAM files were used to call iSNVs present in each replicate with a minimum minor allele  
459 frequency (MAF) threshold of 3%. Joint variant calling of the 30 entire amplicon libraries, and between  
460 replicates of the same sample for fragmented amplicon libraries, was achieved by generating a pileup  
461 using *SAMtools mpileup v1.9* [58] with the following parameters: *-A -d 600000 -B -Q 0*. The output file

462 was used to detect iSNVs with *VarScan mpileup2cns v2.3.9* [62] and the following parameters: *--min-*  
463 *var-freq 0.03 --min-avg-qual 20*.

464 For each sample, inter-replicate discordant variants were identified by iSNV variant calling after  
465 merging sequencing data from all replicates, considering only genotyped positions. A discordant  
466 variant was defined as a variant called in one replicate, whereas the same position in the other  
467 replicate reported the reference allele.

#### 468 **Calculation of the concordance rate**

469 The concordance rate ( $R_c$ ) between replicates samples was calculated as follows:

$$470 \quad R_c = \frac{N_c}{\text{Mean}(N_1, N_2)}$$

471

472  $N_c$  represents (i) the number of shared variants (consensus variants or iSNVs) excluding positions that  
473 could not be genotyped in at least one replicate, or (ii) the number of shared genotypable bases,  
474 excluding positions marked N in at least one replicate, or (iii) the number of shared amplicons with  
475 coverage higher than three reads in all replicates.  $N_1$  and  $N_2$  represent the total number of iSNVs,  
476 consensus variants, genotypable bases or covered amplicons detected in each of the two samples in  
477 the analysis.  $R_c$  was calculated by comparing couples of replicates generated from the same cDNA  
478 (intra-cDNA concordance) and triplets of replicates generated from different cDNAs (inter-cDNA  
479 concordance) as shown in **Table S2**.

#### 480 **Statistical analysis**

481 The non-parametric Wilcoxon signed rank test and the Mann Whitney U-test were used to compare  
482 matched pairs and non-matched data, respectively. The non-parametric Friedman test was used to  
483 compare multiple paired groups. Significance of pairing was confirmed by calculating Spearman's rho.  
484 We used GraphPad Prism 6.0 (GraphPad Software, San Diego, CA, USA) for all statistical analysis, with  
485 a significance threshold of  $p < 0.05$ .

486 **DECLARATIONS**

487 **Ethics approval and consent to participate**

488 The study was approved by the competent Ethical Committee for Clinical Research of Verona and  
489 Rovigo Provinces (Prot N° 39528/2020)

490 **Consent for publication**

491 Not applicable.

492 **Availability of data and materials**

493 The raw reads dataset supporting the conclusions of this article is available at the NCBI SRA repository  
494 under BioProject ID PRJNA690890.

495 **Competing interests**

496 The authors declare that they have no competing interests

497 **Funding**

498 The work performed at IRCCS Sacro Cuore Don Calabria Hospital was supported by the Italian Ministry  
499 of Health “Fondi Ricerca corrente—L1P5”.

500 **Authors' contributions**

501 The study was conceived and coordinated by MD and MR. The samples and RNA extraction and RT-  
502 qPCR analysis were provided and performed by CP, AM, EP, MD, SS, ZB. Reverse transcription,  
503 amplification of the SARS-CoV-2 genome, library preparation and sequencing were performed by CB,  
504 CDE, VG, EM, MP, ES, BG. The data filtering and reference genome alignment, the consensus variant  
505 calling and generation of the consensus sequence, the iSNV variant calling, the calculation of the  
506 concordance rate and the statistical analysis were performed by LM, GL, SM, DL, BI, MG. The

507 manuscript was written by MR with input from all co-authors. All authors read and approved the final  
508 manuscript

### 509 **Acknowledgements**

510 We gratefully acknowledge the Centro Piattaforme Tecnologiche (CPT) for granting access to the  
511 genomic facility of University of Verona for sequencing on a MiSeq and NextSeq500 Illumina platform,  
512 and Dr. Richard M Twyman ([www.twymanrm.com](http://www.twymanrm.com)) for editing the manuscript text.

### 513 **Authors' information**

514 1Department of Biotechnology, University of Verona, Strada le Grazie 15, 37134 Verona, Italy

515 2Department of Infectious and Tropical Diseases and Microbiology, IRCCS Sacro Cuore Don Calabria  
516 Hospital, Negrar di Valpolicella, 37024 Verona, Italy

517 3Department of Diagnostics and Public Health, University of Verona, 37134 Verona, Italy

518 4Genartis srl, via IV Novembre 24, 37126 Verona, Italy

519

### 520 **REFERENCES**

- 521 1. COVID-19 Dashboard by the Center for Systems Science and Engineering (CSSE) at Johns Hopkins  
522 University (JHU) [Internet]. Available from: <https://coronavirus.jhu.edu/map.html>
- 523 2. Wu F, Zhao S, Yu B, Chen YM, Wang W, Song ZG, et al. A new coronavirus associated with human  
524 respiratory disease in China. *Nature*. 2020;579:265–9.
- 525 3. GISAID Initiative [Internet]. Available from: <https://www.gisaid.org/>
- 526 4. Plante JA, Liu Y, Liu J, Xia H, Johnson BA, Lokugamage KG, et al. Spike mutation D614G alters SARS-  
527 CoV-2 fitness. *Nature* [Internet]. Springer US; 2020; Available from:  
528 <http://dx.doi.org/10.1038/s41586-020-2895-3>
- 529 5. Korber B, Fischer WM, Gnanakaran S, Yoon H, Theiler J, Abfalterer W, et al. Tracking Changes in  
530 SARS-CoV-2 Spike: Evidence that D614G Increases Infectivity of the COVID-19 Virus. *Cell*.  
531 2020;182:812-827.e19.
- 532 6. van Dorp L, Acman M, Richard D, Shaw LP, Ford CE, Ormond L, et al. Emergence of genomic  
533 diversity and recurrent mutations in SARS-CoV-2. *Infect Genet Evol* [Internet]. Elsevier;  
534 2020;83:104351. Available from: <https://doi.org/10.1016/j.meegid.2020.104351>
- 535 7. Li Q, Wu J, Nie J, Zhang L, Hao H, Liu S, et al. The Impact of Mutations in SARS-CoV-2 Spike on Viral

536 Infectivity and Antigenicity. *Cell* [Internet]. Elsevier; 2020;182:1284-1294.e9. Available from:  
537 <http://dx.doi.org/10.1016/j.cell.2020.07.012>

538 8. Yao H, Lu X, Chen Q, Xu K, Chen Y, Cheng M, et al. Patient-derived SARS-CoV-2 mutations impact  
539 viral replication dynamics and infectivity in vitro and with clinical implications in vivo. *Cell Discov*  
540 [Internet]. Springer US; 2020;6:1–16. Available from: <http://dx.doi.org/10.1038/s41421-020-00226-1>

541 9. Rahman MS, Islam MR, Alam ASMRU, Islam I, Hoque MN, Akter S, et al. Evolutionary dynamics of  
542 SARS-CoV-2 nucleocapsid protein and its consequences. *J Med Virol*. 2020;

543 10. Geoghegan JL, Ren X, Storey M, Hadfield J, Jelley L, Jefferies S, et al. Genomic epidemiology  
544 reveals transmission patterns and dynamics of SARS-CoV-2 in Aotearoa New Zealand. *medRxiv*  
545 [Internet]. 2020;2020.08.05.20168930. Available from:  
546 <https://www.medrxiv.org/content/10.1101/2020.08.05.20168930v3>

547 11. Rockett RJ, Arnott A, Lam C, Sadsad R, Timms V, Gray KA, et al. Revealing COVID-19 transmission  
548 in Australia by SARS-CoV-2 genome sequencing and agent-based modeling. *Nat Med*. 2020;

549 12. Gudbjartsson DF, Helgason A, Jonsson H, Magnusson OT, Melsted P, Norddahl GL, et al. Spread  
550 of SARS-CoV-2 in the Icelandic population. *N Engl J Med*. 2020;382:2302–15.

551 13. Oude Munnink BB, Nieuwenhuijse DF, Stein M, O’Toole Á, Haverkate M, Mollers M, et al. Rapid  
552 SARS-CoV-2 whole-genome sequencing and analysis for informed public health decision-making in  
553 the Netherlands. *Nat Med*. 2020;26:1405–10.

554 14. Houldcroft CJ, Beale MA, Breuer J. Clinical and biological insights from viral genome sequencing.  
555 *Nat Rev Microbiol*. Nature Publishing Group; 2017;15:183–92.

556 15. Gire SK, Goba A, Andersen KG, Sealfon RSG, Park DJ, Kanneh L, et al. Genomic surveillance  
557 elucidates Ebola virus origin and transmission during the 2014 outbreak. *Science* (80- ).  
558 2014;345:1369–72.

559 16. McCrone JT, Woods RJ, Martin ET, Malosh RE, Monto AS, Luring AS. Stochastic processes  
560 constrain the within and between host evolution of influenza virus. *Elife*. 2018;7:1–19.

561 17. Gardy J, Loman NJ, Rambaut A. Real-time digital pathogen surveillance - the time is now.  
562 *Genome Biol* [Internet]. *Genome Biology*; 2015;16:15–7. Available from:  
563 <http://dx.doi.org/10.1186/s13059-015-0726-x>

564 18. Park DJ, Dudas G, Wohl S, Goba A, Whitmer SLM, Andersen KG, et al. Ebola Virus Epidemiology,  
565 Transmission, and Evolution during Seven Months in Sierra Leone. *Cell*. 2015;161:1516–26.

566 19. Dube Mandishora RS, Gjøtterud KS, Lagström S, Stray-Pedersen B, Duri K, Chin’ombe N, et al.  
567 Intra-host sequence variability in human papillomavirus. *Papillomavirus Res* [Internet]. Elsevier B.V.;  
568 2018;5:180–91. Available from: <https://doi.org/10.1016/j.pvr.2018.04.006>

569 20. Karamitros T, Papadopoulou G, Bousali M, Mexias A, Tsiodras S, Mentis A. SARS-CoV-2 exhibits  
570 intra-host genomic plasticity and low-frequency polymorphic quasispecies. *J Clin Virol* [Internet].  
571 Elsevier B.V.; 2020;131:104585. Available from: <https://doi.org/10.1016/j.jcv.2020.104585>

572 21. Shen Z, Xiao Y, Kang L, Ma W, Shi L, Zhang L, et al. Genomic diversity of SARS-CoV-2 in COVID-19  
573 patients. 2019;1–27.

574 22. Sashittal P, Luo Y, Peng J, El-Kebir M. Characterization of SARS-CoV-2 viral diversity within and  
575 across hosts. 2020;

576 23. Grubaugh ND, Gangavarapu K, Quick J, Matteson NL, De Jesus JG, Main BJ, et al. An amplicon-  
577 based sequencing framework for accurately measuring intrahost virus diversity using PrimalSeq and

578 iVar. *Genome Biol. Genome Biology*; 2019;20:1–19.

579 24. Tyson JR, James P, Stoddart D, Sparks N, Wickenhagen A, Hall G, et al. Improvements to the  
580 ARTIC multiplex PCR method for SARS-CoV-2 genome sequencing using nanopore. *bioRxiv Prepr*  
581 *Serv Biol* [Internet]. 2020; Available from:  
582 <http://www.ncbi.nlm.nih.gov/pubmed/32908977>  
583 <http://www.pubmedcentral.nih.gov/articlerender.fcgi?artid=PMC7480024>

584 25. Walsh KA, Jordan K, Clyne B, Rohde D, Drummond L, Byrne P, et al. SARS-CoV-2 detection, viral  
585 load and infectivity over the course of an infection. *J Infect. Elsevier Ltd*; 2020;81:357–71.

586 26. Lescure FX, Bouadma L, Nguyen D, Parisey M, Wicky PH, Behillil S, et al. Clinical and virological  
587 data of the first cases of COVID-19 in Europe: a case series. *Lancet Infect Dis*. 2020;20:697–706.

588 27. ARTIC Network. Available from: <https://artic.network/ncov-2019>

589 28. Li C, Debruyne D, Spencer J, Kapoor V, Liu L, Zhou B, et al. Highly sensitive and full-genome  
590 interrogation of SARS-CoV-2 using multiplexed PCR enrichment followed by next-generation  
591 sequencing. 2020;

592 29. Resende PC, Motta FC, Roy S, Appolinario L, Fabri A, Xavier J, et al. SARS-CoV-2 genomes  
593 recovered by long amplicon tiling multiplex approach using nanopore sequencing and applicable to  
594 other sequencing platforms. 2020;1–11.

595 30. Itokawa K, Sekizuka T, Hashino M, Tanaka R, Kuroda M. Disentangling primer interactions  
596 improves SARS-CoV-2 genome sequencing by multiplex tiling PCR. *PLoS One* [Internet]. 2020;15:1–  
597 11. Available from: <http://dx.doi.org/10.1371/journal.pone.0239403>

598 31. McNamara RP, Caro-Vegas C, Landis JT, Moorad R, Pluta LJ, Eason AB, et al. High-Density  
599 Amplicon Sequencing Identifies Community Spread and Ongoing Evolution of SARS-CoV-2 in the  
600 Southern United States. *Cell Rep* [Internet]. Elsevier Company.; 2020;33:108352. Available from:  
601 <https://doi.org/10.1016/j.celrep.2020.108352>

602 32. Klempt P, Brož P, Kašný M, Novotný A, Kvapilová K, Kvapil P. Performance of targeted library  
603 preparation solutions for SARS-CoV-2 whole genome analysis. *Diagnostics*. 2020;10:1–12.

604 33. Quick J, Grubaugh ND, Pullan ST, Claro IM, Smith AD, Gangavarapu K, et al. Multiplex PCR  
605 method for MinION and Illumina sequencing of Zika and other virus genomes directly from clinical  
606 samples. *Nat Protoc*. 2017;12:1261–6.

607 34. Turakhia Y, De Maio N, Thornlow B, Gozashti L, Lanfear R, Walker CR, et al. Stability of SARS-CoV-  
608 2 phylogenies [Internet]. *PLOS Genet*. 2020. Available from:  
609 <http://dx.doi.org/10.1371/journal.pgen.1009175>

610 35. Rayko M, Komissarov A. Quality control of low-frequency variants in SARS-CoV-2 genomes. 2020;

611 36. Mercatelli D, Giorgi FM. Geographic and Genomic Distribution of SARS-CoV-2 Mutations. *Front*  
612 *Microbiol*. 2020;11:1–13.

613 37. Moreno G, Braun K, Halfmann P, Prall T, Riemersma K, Haj A, et al. Limited SARS-CoV-2 diversity  
614 within hosts and following passage in cell culture. 2020;

615 38. Andrés C, Garcia-Cehic D, Gregori J, Piñana M, Rodriguez-Frias F, Guerrero-Murillo M, et al.  
616 Naturally occurring SARS-CoV-2 gene deletions close to the spike S1/S2 cleavage site in the viral  
617 quasispecies of COVID19 patients. *Emerg Microbes Infect*. 2020;9:1900–11.

618 39. Liu T, Chen Z, Chen W, Chen X, Hosseini M, Yang Z, et al. A benchmarking study of SARS-CoV-2  
619 whole-genome sequencing protocols using COVID-19 patient samples. *bioRxiv* [Internet].



620 2020;2020.11.10.375022. Available from: <https://doi.org/10.1101/2020.11.10.375022>

621 40. Doddapaneni H, Cregeen SJ, Sugang R, Meng Q, Qin X, Avadhanula V, et al. Oligonucleotide  
622 capture sequencing of the SARS-CoV-2 genome and subgenomic fragments from COVID-19  
623 individuals. *bioRxiv* [Internet]. 2020;2020.07.27.223495. Available from:  
624 <https://doi.org/10.1101/2020.07.27.223495>

625 41. Lu J, du Plessis L, Liu Z, Hill V, Kang M, Lin H, et al. Genomic Epidemiology of SARS-CoV-2 in  
626 Guangdong Province, China. *Cell*. 2020;181:997-1003.e9.

627 42. Pillay S, Giandhari J, Tegally H, Wilkinson E, Chimukangara B, Lessells R, et al. Whole genome  
628 sequencing of sars-cov-2: Adapting illumina protocols for quick and accurate outbreak investigation  
629 during a pandemic. *Genes (Basel)*. 2020;11:1–13.

630 43. Kubik S, Marques AC, Xing X, Silvery J, Bertelli C, De Maio F, et al. Guidelines for accurate  
631 genotyping of SARS-CoV-2 using amplicon-based sequencing of clinical samples. *bioRxiv* [Internet].  
632 2020;2020.12.01.405738. Available from:  
633 <http://biorxiv.org/content/early/2020/12/01/2020.12.01.405738.abstract>

634 44. Torres D de A, Ribeiro L do CB, Riello AP de FL, Horovitz DDG, Pinto LFR, Croda J. Reinfection of  
635 COVID-19 after 3 months with a distinct and more aggressive clinical presentation: Case report. *J*  
636 *Med Virol*. 2020;

637 45. Tillett RL, Sevinsky JR, Hartley PD, Kerwin H, Crawford N, Gorzalski A, et al. Genomic evidence for  
638 reinfection with SARS-CoV-2: a case study. *Lancet Infect Dis* [Internet]. Elsevier Ltd; 2020;21:52–8.  
639 Available from: [http://dx.doi.org/10.1016/S1473-3099\(20\)30764-7](http://dx.doi.org/10.1016/S1473-3099(20)30764-7)

640 46. Buchan BW, Hoff JS, Gmehlin CG, Perez A, Faron ML, Munoz-Price LS, et al. Distribution of SARS-  
641 CoV-2 PCR cycle threshold values provide practical insight into overall and target-specific sensitivity  
642 among symptomatic patients. *Am J Clin Pathol*. 2020;154:479–85.

643 47. Zhang RZ, Deng W, He J, Song YY, Qian CF, Yu Q, et al. Case Report: Recurrence of Positive SARS-  
644 CoV-2 Results in Patients Recovered From COVID-19. *Front Med*. 2020;7:1–5.

645 48. Li Q, Zheng XS, Shen XR, Si HR, Wang X, Wang Q, et al. Prolonged shedding of severe acute  
646 respiratory syndrome coronavirus 2 in patients with COVID-19. *Emerg Microbes Infect*. 2020;9:2571–  
647 7.

648 49. Zapor M. Persistent Detection and Infectious Potential of SARS-CoV-2 Virus in Clinical Specimens  
649 from COVID-19 Patients. *Viruses*. 2020;12:1–17.

650 50. Brief TA. European Centre for Disease Prevention and Control. Reinfection with SARS-CoV:  
651 considerations for public health response: ECDC; 2020. 2020; Available from:  
652 <https://www.ecdc.europa.eu/en/publications-data/threat-assessment-brief-reinfection-sars-cov-2>

653 51. Lu J, Tillett R, Long Q, Kong H, Kong H, Kong H, et al. COVID-19 reinfection: are we ready for  
654 winter? *EBioMedicine*. 2020;62.

655 52. Voloch CM, da Silva Jr RF, P de Almeida LG, Brustolini OJ, Cardoso CC, Gerber AL, et al. Intra-host  
656 evolution during SARS-CoV-2 persistent infection. *medRxiv* [Internet]. 2020;2020.11.13.20231217.  
657 Available from: <https://doi.org/10.1101/2020.11.13.20231217>

658 53. Forster P, Forster L, Renfrew C, Forster M. Phylogenetic network analysis of SARS-CoV-2  
659 genomes. *Proc Natl Acad Sci U S A*. 2020;117:9241–3.

660 54. CDC 2019-Novel Coronavirus (2019-nCoV) Real-Time RT-PCR Diagnostic Panel [Internet].  
661 Available from: <https://www.fda.gov/media/134922/download>

662 55. Tarasov A, Vilella AJ, Cuppen E, Nijman IJ, Prins P. Sambamba: Fast processing of NGS alignment  
663 formats. *Bioinformatics*. 2015;31:2032–4.

664 56. Bolger AM, Lohse M, Usadel B. Trimmomatic: A flexible trimmer for Illumina sequence data.  
665 *Bioinformatics*. 2014;30:2114–20.

666 57. Li H. Aligning sequence reads, clone sequences and assembly contigs with BWA-MEM.  
667 2013;00:1–3. Available from: <http://arxiv.org/abs/1303.3997>

668 58. Li H. A statistical framework for SNP calling, mutation discovery, association mapping and  
669 population genetical parameter estimation from sequencing data. *Bioinformatics*. 2011;27:2987–93.

670 59. Quinlan AR, Hall IM. BEDTools: A flexible suite of utilities for comparing genomic features.  
671 *Bioinformatics*. 2010;26:841–2.

672 60. McKenna A, Hanna M, Banks E, Sivachenko A, Cibulskis K, Kernytsky A, et al. The Genome  
673 Analysis Toolkit: a MapReduce framework for analyzing next-generation DNA sequencing data.  
674 *Genome Res* [Internet]. 2010/07/19. Cold Spring Harbor Laboratory Press; 2010;20:1297–303.  
675 Available from: <https://pubmed.ncbi.nlm.nih.gov/20644199>

676 61. Li H. Minimap2: Pairwise alignment for nucleotide sequences. *Bioinformatics*. 2018;34:3094–100.

677 62. Koboldt DC, Zhang Q, Larson DE, Shen D, McLellan MD, Lin L, et al. VarScan 2: Somatic mutation  
678 and copy number alteration discovery in cancer by exome sequencing. *Genome Res*. 2012;22:568–  
679 76.

680

681

682

683

684

685

686

687

688

689

690

691

692

693

694

695 **FIGURES**

696

697

698

699

700

701

702

703

704

705

706

707

708

709

710

711

712

713

714

715

716

717

718

719

720

721

722

723

724

725

726

727

728

729

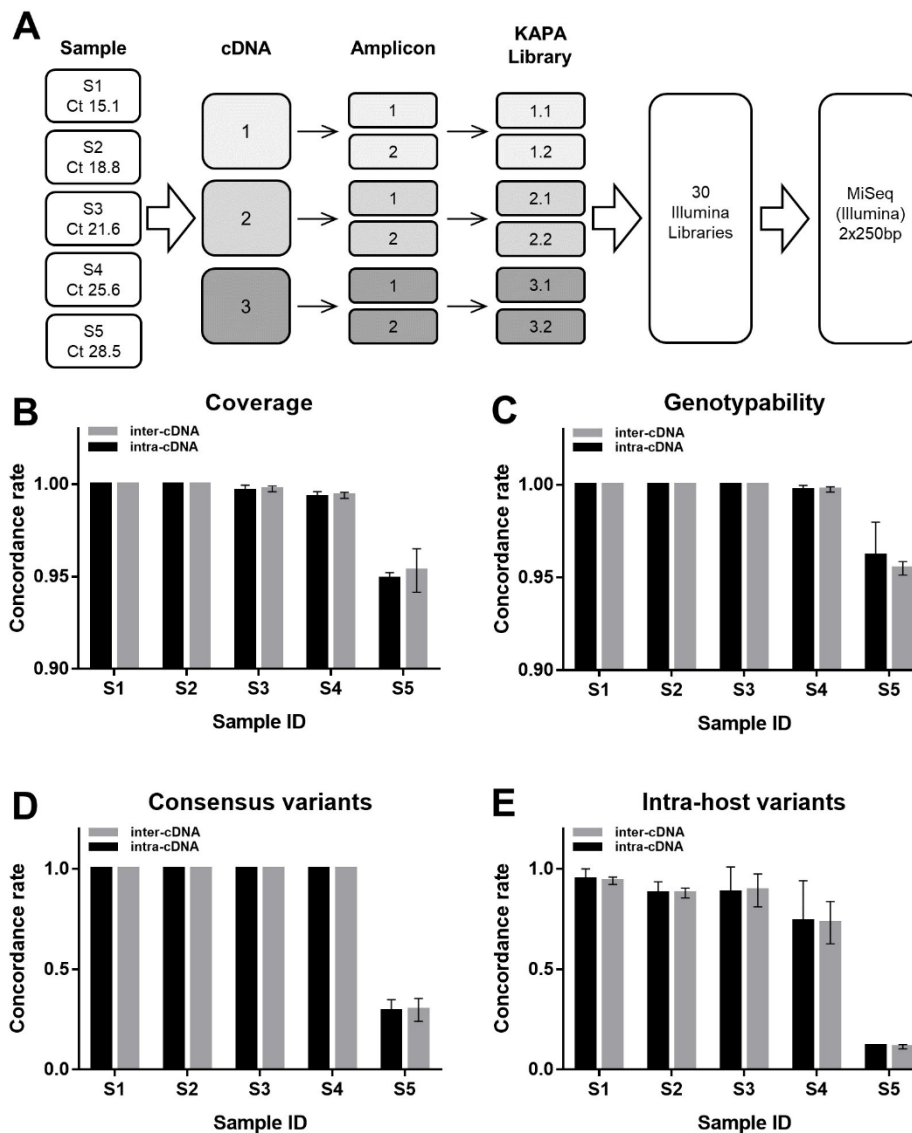

**Figure 1. Comparison of intra-cDNA and inter-cDNA replicates of SARS-CoV-2 genome amplification and sequencing. (A)** Schematic diagram showing the five clinical samples obtained from COVID-19 patients, their RT-qPCR Ct values and the experimental workflow. For each sample, we generated three independent cDNAs and each cDNA was amplified in duplicate using the ARTIC nCoV-2019 V3 Panel. Amplicons used as the input for library preparation were sequenced in 250PE mode on the Illumina MiSeq platform. The bar charts show mean concordance rates ( $\pm$  standard deviations) for **(B)** genome coverage, **(C)** genotypability, **(D)** consensus variants and **(E)** iSNV between amplification replicates generated from different cDNAs (inter-cDNA) or the same cDNA (intra-cDNA).

730  
 731  
 732  
 733  
 734  
 735  
 736  
 737  
 738  
 739  
 740  
 741  
 742  
 743  
 744  
 745  
 746  
 747  
 748  
 749  
 750  
 751  
 752  
 753  
 754  
 755  
 756  
 757  
 758  
 759  
 760  
 761  
 762  
 763  
 764

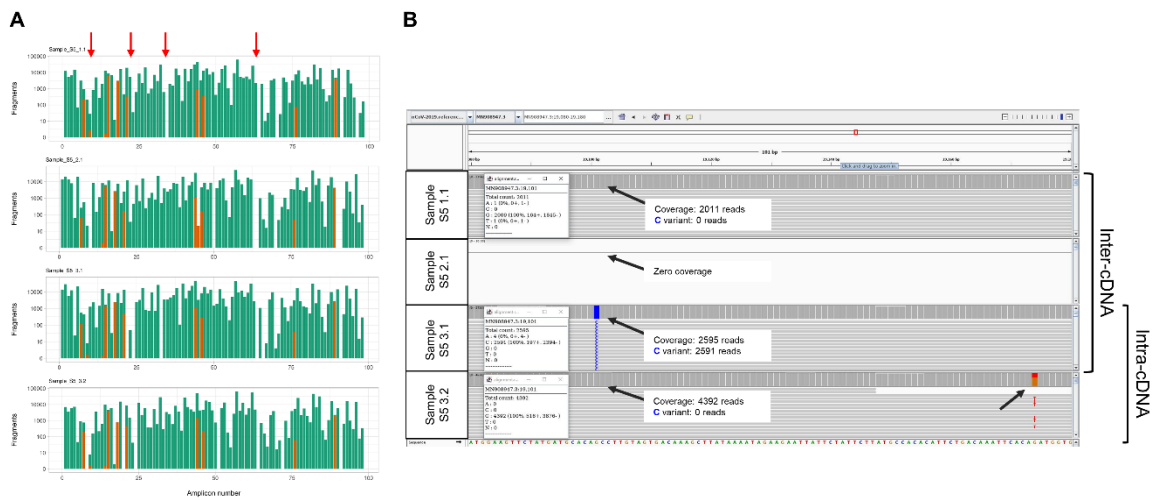

**Figure 2. Coverage and variant calling between intra-cDNA and inter-cDNA replicates. (A)** Sequencing coverage of the 98 amplicons of ARTIC V3 panel from four representative replicates of sample S5. Green bars represent the amplicons generated using the ARTIC original primer set, and orange bars represent the amplicons generated using the alternative V3 primers. Red arrows point at representative amplicons missing in only one replicate. **(B)** Integrative Genomics Viewer (IGV) visualization of four representative sequencing replicates of sample S5 in the region 19,080–19,180 of the SARS-Cov-19 genome. Black arrows indicate variants called only in one replicate. The amplicon was not amplified in replicate S5 2.1.

765  
766  
767  
768  
769  
770  
771  
772  
773  
774  
775  
776  
777  
778  
779  
780  
781  
782  
783  
784  
785  
786  
787  
788  
789  
790  
791  
792  
793  
794  
795  
796  
797  
798  
799

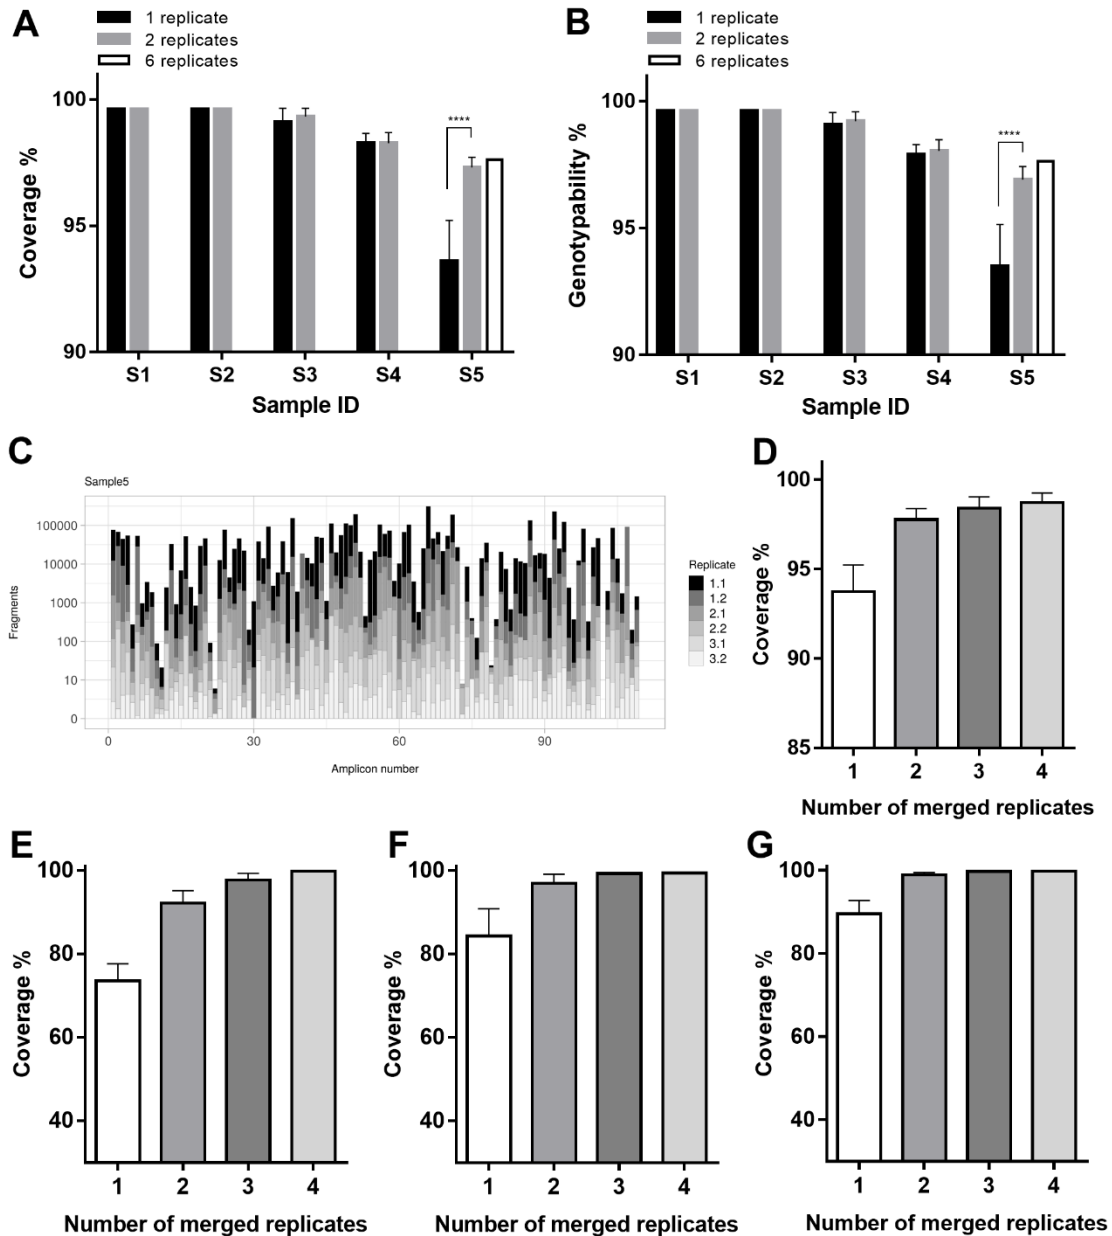

**Figure 3. Merging sequencing replicates can improve coverage and genotypability.** (A) Mean percentage genome coverage ( $\pm$  standard deviations). (B) Mean percentage genotypability ( $\pm$  standard deviations). Both genome coverage and genotypability were calculated for single replicates or after merging all possible combinations of two or six replicates, starting from the same total sequencing reads (\*\*\*\* $p < 0.0001$ , Mann Whitney U-test). (C) The coverage fraction contributed by each of the six replicates generated from sample S5. (D) Percentage of genome coverage after merging different numbers of replicates from sample S5, and from three other COVID-19-positive swab samples, namely samples 3270 (E), 4572 (F), 4173 (E), whose sequencing results are reported in **Table S12**.

800  
 801  
 802  
 803  
 804  
 805  
 806  
 807  
 808  
 809  
 810  
 811  
 812  
 813  
 814  
 815  
 816  
 817  
 818  
 819  
 820  
 821  
 822  
 823  
 824  
 825  
 826  
 827  
 828  
 829  
 830  
 831  
 832  
 833  
 834

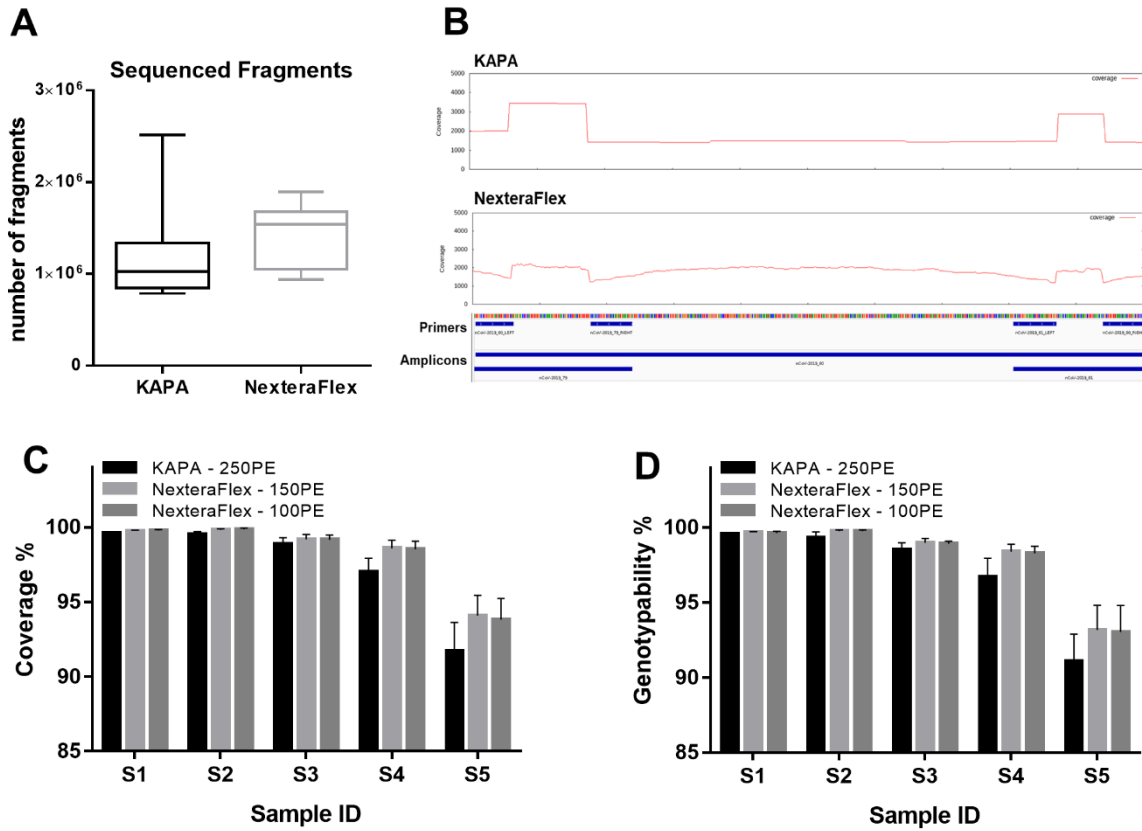

**Figure 4. Comparison of SARS-CoV-2 sequencing and mapping results obtained using the KAPA and NexteraFlex library preparation kits. (A)** Distribution of the number of fragments generated using the KAPA and NexteraFlex kits for the same set of 30 replicates. **(B)** Visualization of mean sequencing coverage on a representative ARTIC amplicon using the KAPA and NexteraFlex library kits. Given the overlap with adjacent amplicons, the 5' and 3' ends show increased coverage. **(C)** Mean coverage ( $\pm$  standard deviations) and **(D)** mean genotypability ( $\pm$  standard deviations) of sequencing libraries prepared from the 30 replicates using either the KAPA or NexteraFlex kits. The 100PE results were obtained from the 150PE dataset by *in silico* trimming.

835  
 836  
 837  
 838  
 839  
 840  
 841  
 842  
 843  
 844  
 845  
 846  
 847  
 848  
 849  
 850

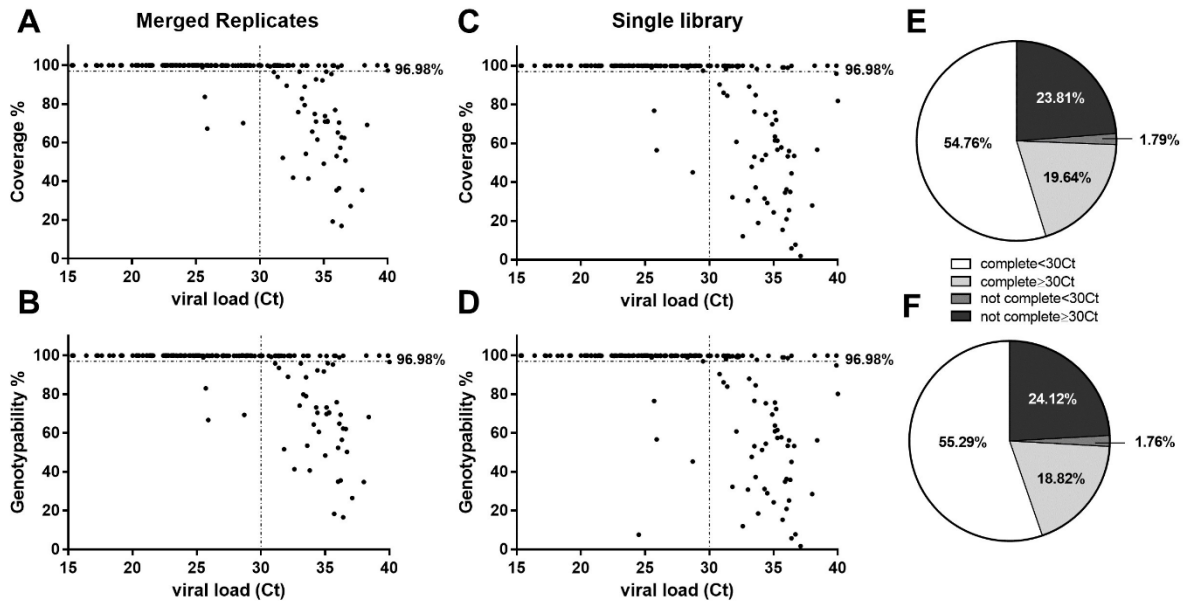

851 **Figure 5. SARS-CoV-2 sequencing in a cohort of clinical samples with wide range of viral titers. (A-**  
 852 **C) Percentage of genome coverage and (B-D) genotypability for each sample (N = 170) considering a**  
 853 **single replicate (selected randomly) or after merging two sequencing replicates. The pie charts show**  
 854 **the fraction of the complete SARS-CoV-2 (>96.98%) genome in terms of (E) coverage or (F)**  
 855 **genotypability for samples with Ct < or ≥ 30.**
